# Supplementary material for: cxcl18b-defined transitional state-specific nitric oxide drives injury-induced Müller glia cell-cycle re-entry in the zebrafish retina
Source: eLife journal article supplement (doi:10.7554/elife.106274), 2025-04-30
Supplement: fig6-figsupp1-data1 [file Figure 6-figure supplement 1_Source Data 1.pdf › Figure 6-figure supplement 1_Source Data 1.pdf]

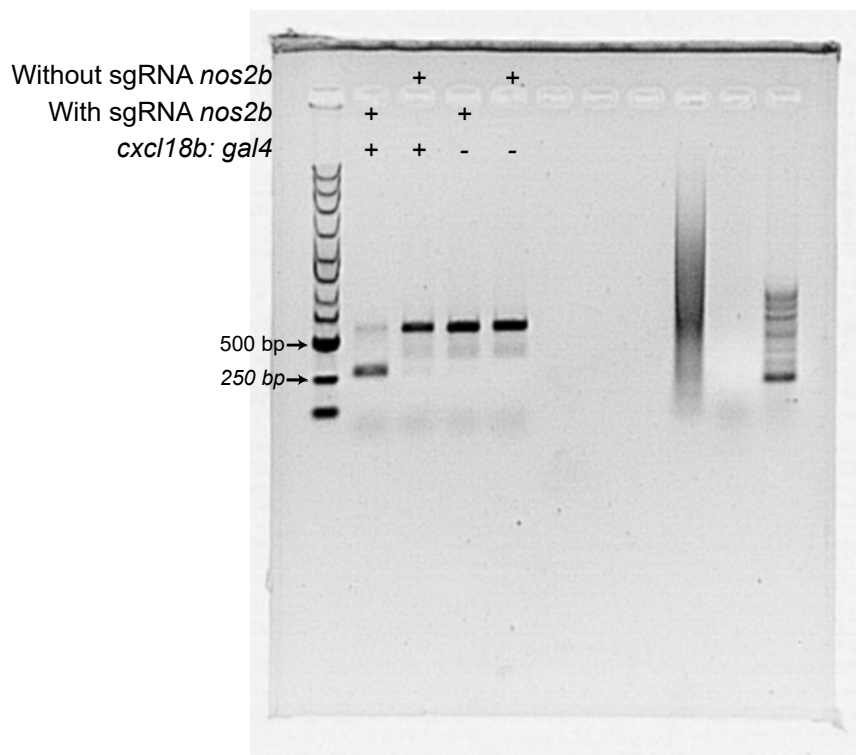

**Figure 6–figure supplement 1, Source Data 1.** Original gel image corresponding to Figure 6–figure supplement 1, panel C. PCR analysis of MG cell–specific gene knockout shows a truncated *nos2b* PCR product (~250 bp), indicative of gene disruption, only in MGs co-infected with *cxc18b:gal4*– and *nos2b* sgRNA–expressing AAVs (lane 1). In contrast, dual-AAV infection with a scrambled sgRNA control (lane 2) or infection with either AAV alone (lanes 3–4) yields only the full-length amplicon (~500 bp), indicating that effective *nos2b* knockout in MG cells requires dual-AAV delivery of *cxc18b:gal4*–driven Cas9 and the targeting sgRNA.
