# Supplementary material for: cxcl18b-defined transitional state-specific nitric oxide drives injury-induced Müller glia cell-cycle re-entry in the zebrafish retina
Source: eLife. 2026 Jan 21;14:RP106274. doi: 10.7554/eLife.106274 (PMC12823065; doi:10.7554/eLife.106274)
Supplement: Figure 1—source data 1. [file elife-106274-fig1-data1.xlsx]

## Sheet: microglia
Uninjury	24 hpi	48 hpi	72 hpi	96 hpi	120 hpi
2	6	16	29	10	8
2	7	20	30	11	8
3	6	18	33	16	6
0	8	19	29	13	8
2	7	22	16	15	9
6	7	17	29	16	8
2	8	17	26	11	13
3	9	25	23	13	14
3	9	20	18	9	8
3	8	16	20	14	8
3			16	10	9
1				11	11
5					11
4					12
					8
					8

## Sheet: GR cones
Uninjury	24 hpi	48 hpi	72 hpi	96 hpi	120 hpi
89	83	59	23	8	11
106	80	50	21	6	9
102	84	56	19	8	7
119	81	66	16	9	6
102	92	62	18	10	12
105	93	54	17	10	9
92	98	65	16	7	13
99	91	62	17	9	10
94	88	60	22	10	11
96	99	57	13	8	8
95			12	6	6
101				6	8
92					7
82					9
					6
					8

## Sheet: PCNA
Uninjury	24 hpi	48 hpi	72 hpi	96 hpi	120 hpi
0	3	8	15	6	4
0	2	9	14	9	3
0	2	8	14	15	4
0	0	4	16	7	3
2	1	8	9	8	5
1	2	7	14	13	3
1	1	10	13	9	8
1	3	8	8	9	5
1	0	9	12	8	6
2	2	6	15	8	8
1			16	10	4
1				12	7
1					4
1					4
					5
					3
