# Supplementary material for: cxcl18b-defined transitional state-specific nitric oxide drives injury-induced Müller glia cell-cycle re-entry in the zebrafish retina
Source: eLife. 2026 Jan 21;14:RP106274. doi: 10.7554/eLife.106274 (PMC12823065; doi:10.7554/eLife.106274)
Supplement: Figure 2—figure supplement 1—source data 1. [file elife-106274-fig2-figsupp1-data1.xlsx]

## Sheet: Sheet1
cxcl18b KO in Tg(lws2: nfsb-mcherry)
WT	Scrambled	sgCxcl18b injection
15	10	15
14	8	14
14	8	17
16	13	10
9	15	13
14	13	8
13	9	13
8
12
15
16
