# Supplementary material for: cxcl18b-defined transitional state-specific nitric oxide drives injury-induced Müller glia cell-cycle re-entry in the zebrafish retina
Source: eLife. 2026 Jan 21;14:RP106274. doi: 10.7554/eLife.106274 (PMC12823065; doi:10.7554/eLife.106274)
Supplement: Figure 2—source data 1. [file elife-106274-fig2-data1.xlsx]

## Sheet: cxcl18b+ MG
cxcl18b in situ
Uninjury	24 hpi	48 hpi	72 hpi	96 hpi	120 hpi
0	11	3	2	1	0
0	5	5	5	0	1
0	9	5	4	1	1
0	9	5	4	0	3
0	6	6	3	0	0
0	19	5	6	3
0	13	4	2	2
0	13	4	1
0	11	4	0
0	13	3	4
0		5	0
		4

## Sheet: PCNA+ MG
PCNA
Uninjury	24 hpi	48 hpi	72 hpi	96 hpi	120 hpi
0	0	4	8	4	0
0	0	2	10	5	2
0	0	5	11	5	0
0	0	6	8	4	2
0	1	6	9	5	1
0	0	5	12	7
0	0	5	7	6
1	0	7	8
0	0	4	7
0	0	2	10
0		4	8
		4
