# Supplementary material for: cxcl18b-defined transitional state-specific nitric oxide drives injury-induced Müller glia cell-cycle re-entry in the zebrafish retina
Source: eLife. 2026 Jan 21;14:RP106274. doi: 10.7554/eLife.106274 (PMC12823065; doi:10.7554/eLife.106274)
Supplement: Figure 2—source data 2. [file elife-106274-fig2-data2.xlsx]

## Sheet: Sheet1
	cxcl18b-GFP+							PCNA+
Uninjury	0	0	0	1				0	0	0	1
48 hpi	11	6	12	7	11	10	6	1	0	2	0	0	1	0
