# Supplementary material for: cxcl18b-defined transitional state-specific nitric oxide drives injury-induced Müller glia cell-cycle re-entry in the zebrafish retina
Source: eLife. 2026 Jan 21;14:RP106274. doi: 10.7554/eLife.106274 (PMC12823065; doi:10.7554/eLife.106274)
Supplement: Figure 2—source data 3. [file elife-106274-fig2-data3.xlsx]

## Sheet: Sheet1
Tg(cxcl18b: Cre) injury at 72-hpi
PCNA+ MG	Cxcl18b+ and PCNA+ MG
14	13
15	13
13	12
16	14
14	14
10	9
16	14
15	15
14	13
12	10
14	14
12	12
12	12
11	10
