# Supplementary material for: cxcl18b-defined transitional state-specific nitric oxide drives injury-induced Müller glia cell-cycle re-entry in the zebrafish retina
Source: eLife. 2026 Jan 21;14:RP106274. doi: 10.7554/eLife.106274 (PMC12823065; doi:10.7554/eLife.106274)
Supplement: Figure 2—source data 4. [file elife-106274-fig2-data4.xlsx]

## Sheet: Sheet1
GS+&Cre-	GS+ &Cre+		Total of GS+	% of Cre-	% of Cre+
10	6		16	0.625	0.375
10	5		15	0.666667	0.333333
9	5		14	0.642857	0.357143
9	6		15	0.6	0.4
8	7		15	0.533333	0.466667
9	9		18	0.5	0.5
10	6		16	0.625	0.375
5	5		10	0.5	0.5
6	4		10	0.6	0.4
10	7		17	0.588235	0.411765
6	10		16	0.375	0.625
10	5		15	0.666667	0.333333
8	7		15	0.533333	0.466667
5	7		12	0.416667	0.583333
				0.56234	0.43766
