# Supplementary material for: cxcl18b-defined transitional state-specific nitric oxide drives injury-induced Müller glia cell-cycle re-entry in the zebrafish retina
Source: eLife. 2026 Jan 21;14:RP106274. doi: 10.7554/eLife.106274 (PMC12823065; doi:10.7554/eLife.106274)
Supplement: Figure 2—source data 5. [file elife-106274-fig2-data5.xlsx]

## Sheet: Sheet1
Tg(lws2: nfsb-mhcerry; mpeg1-GFP)
3 dpi				3 dpi_DMSO				3 dpi_Dexamethasone
cxcl18b+ MG	microglia	PCNA+ MG		cxcl18b+ MG	microglia	PCNA+ MG		cxcl18b+ MG	microglia	PCNA+ MG
13	25	14		25	31	17		9	17	9
19	28	17		23	34	19		10	13	8
17	35	18		14	24	15		12	15	12
16	26	15		18	20	14		20	20	11
16	28	17		13	28	19		10	17	10
17	23	16		20	27	15		7	10	8
16	33	11			25	20		11	13	7
22	28	8						12	20	7
18	29	14						11	19	4
16								7	17	6
20									18	10
18									15	7
23									22	8
18									20	7
