# Supplementary material for: cxcl18b-defined transitional state-specific nitric oxide drives injury-induced Müller glia cell-cycle re-entry in the zebrafish retina
Source: eLife. 2026 Jan 21;14:RP106274. doi: 10.7554/eLife.106274 (PMC12823065; doi:10.7554/eLife.106274)
Supplement: Figure 4—source data 1. [file elife-106274-fig4-data1.xlsx]

## Sheet: microglia
WT	scrambled	sgRNA NOS1	sgRNA NOS2a	sgRNA NOS2b	sgRNA GSNOR
29	28	14	27	28	18
30	30	23	26	23	27
33	25	23	19	21	25
29	19	13	28	25	21
16	24	19	19	29	13
29	22	19	15	16	16
26	12	17		18	19
23		21		23	24
18		23		20	15
20		22		16	22
16				14	18
				19	13
					17

## Sheet: GR cones
WT	scrambled	sgRNA NOS1	sgRNA NOS2a	sgRNA NOS2b	sgRNA GSNOR
23	13	15	14	23	12
21	15	13	15	14	20
19	15	20	18	18	18
16	20	16	14	17	14
18	17	12	15	13	15
17	10	13	10	16	10
16	16	12		15	17
17		15		15	12
22		15		15	13
13		20		14	12
12				11	10
				16	20
					10

## Sheet: PCNA+ MG
WT	scrambled	sgRNA NOS1	sgRNA NOS2a	sgRNA NOS2b	sgRNA GSNOR
14	10	9	8	7	9
14	8	8	12	7	13
13	8	7	7	4	9
9	13	5	8	7	10
11	15	8	8	5	6
13	13	10	9	7	7
8	9	7	7	5	11
14		8	7	7	15
11		9	10	6	10
9		12	8	6	14
15		8	7	10	9
		9	9	8	15
		10	14	6	11
		14	7	5
		11	10	4
		9		6
		13		5
		10		8
		11		7
		8		7
		6		4
		10		4
		9
