# Supplementary material for: cxcl18b-defined transitional state-specific nitric oxide drives injury-induced Müller glia cell-cycle re-entry in the zebrafish retina
Source: eLife. 2026 Jan 21;14:RP106274. doi: 10.7554/eLife.106274 (PMC12823065; doi:10.7554/eLife.106274)
Supplement: Figure 4—source data 2. [file elife-106274-fig4-data2.xlsx]

## Sheet: microglia
number of microglia
Uninjection	PBS	L_NMMA	L_NAME	1400w	C-PTIO
29	27	31	31	27	12
30	25	32	20	26	12
33	28	30	27	28	14
29	26	32	31	25	6
16	28	34	30	25	10
29	24	30	22	33	20
26	24	31	30	29	11
23	27	30	29	28	10
18	24	34	27	27	10
20	31	28	28	30	5
16	18	26	23		5
	31	28	26		5
	32				15
	25				14
	22				13
	22				14
					16
					13
					13
					15
					14
					13
					11
					12
					13
					15
					15
