# Supplementary material for: cxcl18b-defined transitional state-specific nitric oxide drives injury-induced Müller glia cell-cycle re-entry in the zebrafish retina
Source: eLife. 2026 Jan 21;14:RP106274. doi: 10.7554/eLife.106274 (PMC12823065; doi:10.7554/eLife.106274)
Supplement: Figure 4—source data 3. [file elife-106274-fig4-data3.xlsx]

## Sheet: heterozygous
PCNA+ MG
WT	nos1 +/-	nos2a +/-	nos2b +/-	GSNOR +/-
10	8	10	5	12
12	9	8	2	11
11	12	8	3	11
10	10	8	4	11
15	8	11	2	11
12	8	10	1	17
9	12	10	2	9
11	11	9	5	8
10	7	6	1	12
11	7	6	1	13
11	13	14	5	10
12	10	9	3	9
11	10	9	2
7	9		3
	11		6
	8		6
	7		3
	8		6
	10		1
			2

## Sheet: homozygous
PCNA+ MG
WT	nos1 -/-	nos2a -/-	nos2b -/-	GSNOR -/-
10	11	9	9	9
12	13	10	8	9
11	8	16	6	8
10	7	10	7	8
15	9	10	5	9
12	13	9	5	11
9	10	12	4	9
11	13	8	8	17
10	11	11	7	7
11	13	9	5	11
11	8	12	8	9
12	6	11	5	7
11	6	11	4	8
7	7	11	4	8
	6	12	4	10
	8	8	3	8
	7	8	8	5
	6	9	7	8
		9	6	13
		11	2	14
				10
				9
				11
				10
				12
				6
				9

## Sheet: nos2b-F1 VS F2
PCNA+ MG
WT	nos2b +/-	nos2b -/-
10	5	9
12	2	8
11	3	6
10	4	7
15	2	5
12	1	5
9	2	4
11	5	8
10	1	7
11	1	5
11	5	8
12	3	5
11	2	4
7	3	4
	6	4
	6	3
	3	8
	6	7
	1	6
	2	2

## Sheet: cone cells
cone cells
WT	nos2b +/-	nos2b -/-
37	59	32
37	39	39
45	45	31
39	65	61
37	40	34
47	28	56
43	28	52
47	27	46
47	50	46
49	55	42
52	59	63
57	54	45
44	56	42
40	49	37
64	34	54
51	62	51
47	51	55
46	57	45
49	56	35
40	56	49
47
26
37
47
