# Supplementary material for: cxcl18b-defined transitional state-specific nitric oxide drives injury-induced Müller glia cell-cycle re-entry in the zebrafish retina
Source: eLife. 2026 Jan 21;14:RP106274. doi: 10.7554/eLife.106274 (PMC12823065; doi:10.7554/eLife.106274)
Supplement: Figure 5—figure supplement 1—source data 1. [file elife-106274-fig5-figsupp1-data1.xlsx]

## Sheet: D
20231019-1
Δct	other cell type	RPs	Uninjury Muller	3 dpi Muller	cxcl18b+ Muller	PCNA+ Muller		Δct	other cell type	other cell type	other cell type	other cell type	other cell type	other cell type	Average
								glula	1.34333	1.69333	1.86333	0.853333	1.55	1.93667	1.54
glula	1.34333	-0.00333333	-1.95333	-1.84667	0.5	1.14333		glulb	3.57333	3.53667	4.65667	5.48	3.79667	4.58333	4.27111
glulb	3.57333	3.46333	0.366667	-0.633333	0.963333	3.47
								Δct	other cell type	other cell type	other cell type	other cell type	other cell type	other cell type		ΔΔct/other cell type								power
								glula	1.34333	1.69333	1.86333	0.853333	1.55	1.93667		glula	-0.196667	0.153333	0.323333	-0.686667	0.01	0.396667		glula	1.14605	0.899171	0.799221	1.60956	0.993092	0.759611
20231019-2								glulb	3.57333	3.53667	4.65667	5.48	3.79667	4.58333		glulb	-0.697778	-0.734444	0.385556	1.20889	-0.474444	0.312222		glulb	1.622	1.66376	0.765484	0.432602	1.38938	0.8054
Δct	other cell type	RPs	Uninjury Muller	3 dpi Muller	cxcl18b+ Muller	PCNA+ Muller
glula	1.69333	0.206667	-1.82667	-1.97	0.813333	-0.0166667		Δct	RPs	RPs	RPs	RPs	RPs	RPs		ΔΔct/other cell type
glulb	3.53667	2.49667	-0.116667	-0.613333	0.98	1.03667		glula	-0.00333333	0.206667	-0.32	-2.29333	-2.30333	-0.68		glula	-1.54333	-1.33333	-1.86	-3.83333	-3.84333	-2.22			2.91467	2.51984	3.63008	14.2544	14.3535	4.65893
								glulb	3.46333	2.49667	2.34667	-0.34	-0.236667	1.71667		glulb	-0.807778	-1.77444	-1.92444	-4.61111	-4.50778	-2.55444			1.75051	3.42106	3.79591	24.439	22.7497	5.87441
20231019-3								Δct	Uninjury Muller	Uninjury Muller	Uninjury Muller	Uninjury Muller	Uninjury Muller	Uninjury Muller		ΔΔct/other cell type
Δct	other cell type	RPs	Uninjury Muller	3 dpi Muller	cxcl18b+ Muller	PCNA+ Muller		glula	-1.95333	-1.82667	-1.83333	-1.84	-1.78333	-1.68333		glula	-3.49333	-3.36667	-3.37333	-3.38	-3.32333	-3.22333			11.2615	10.315	10.3627	10.4107	10.0097	9.33942
								glulb	0.366667	-0.116667	0.21	0.39	0.04	0.253333		glulb	-3.90444	-4.38778	-4.06111	-3.88111	-4.23111	-4.01778			14.9746	20.934	16.6923	14.7343	18.7798	16.1984
glula	1.86333	-0.32	-1.83333	-2.08333	-0.31	-0.38
glulb	4.65667	2.34667	0.21	-0.463333	1.41667	0.183333
								Δct	3 dpi Muller	3 dpi Muller	3 dpi Muller	3 dpi Muller	3 dpi Muller	3 dpi Muller		ΔΔct/other cell type
								glula	-1.84667	-1.97	-2.08333	-1.79	-1.94	-1.79333		glula	-3.38667	-3.51	-3.62333	-3.33	-3.48	-3.33333			10.459	11.3924	12.3234	10.0561	11.1579	10.0794
								glulb	-0.633333	-0.613333	-0.463333	-0.586667	-0.45	-0.286667		glulb	-4.90444	-4.88444	-4.73444	-4.85778	-4.72111	-4.55778			29.9492	29.5369	26.6201	28.9959	26.3752	23.552
20231128-1
Δct	other cell type	RPs	Uninjury Muller	3 dpi Muller	cxcl18b+ Muller	PCNA+ Muller
								Δct	cxcl18b+ Muller	cxcl18b+ Muller	cxcl18b+ Muller	cxcl18b+ Muller	cxcl18b+ Muller	cxcl18b+ Muller		ΔΔct/other cell type
glula	0.853333	-2.29333	-1.84	-1.79	0.973333	0.93		glula	0.5	0.813333	-0.31	0.973333	0.806667	1.49667		glula	-1.04	-0.726667	-1.85	-0.566667	-0.733333	-0.0433333			2.05623	1.65481	3.605	1.4811	1.66248	1.03049
glulb	5.48	-0.34	0.39	-0.586667	0.963333	1.57		glulb	0.963333	0.98	1.41667	0.963333	0.876667	1.81		glulb	-3.30778	-3.29111	-2.85444	-3.30778	-3.39444	-2.46111			9.9024	9.78866	7.23225	9.9024	10.5155	5.50641
								Δct	PCNA+ Muller	PCNA+ Muller	PCNA+ Muller	PCNA+ Muller	PCNA+ Muller	PCNA+ Muller		ΔΔct/other cell type
20231128-2								glula	1.14333	-0.0166667	-0.38	0.93	0.193333	0.413333		glula	-0.396667	-1.55667	-1.92	-0.61	-1.34667	-1.12667			1.31646	2.94173	3.78423	1.52626	2.54324	2.18354
Δct	other cell type	RPs	Uninjury Muller	3 dpi Muller	cxcl18b+ Muller	PCNA+ Muller		glulb	3.47	1.03667	0.183333	1.57	0.993333	0.733333		glulb	-0.801111	-3.23444	-4.08778	-2.70111	-3.27778	-3.53778			1.74244	9.41163	17.0037	6.50303	9.69861	11.6139
glula	1.55	-2.30333	-1.78333	-1.94	0.806667	0.193333
glulb	3.79667	-0.236667	0.04	-0.45	0.876667	0.993333
									Data analysis
									power / other cell type	glula						glulb
									other cell type	1.14605	0.899171	0.799221	1.60956	0.993092	0.759611	1.622	1.66376	0.765484	0.432602	1.38938	0.8054
20231128-3									RPs	2.91467	2.51984	3.63008	14.2544	14.3535	4.65893	1.75051	3.42106	3.79591	24.439	22.7497	5.87441
Δct	other cell type	RPs	Uninjury Muller	3 dpi Muller	cxcl18b+ Muller	PCNA+ Muller			Uninjury Muller	11.2615	10.315	10.3627	10.4107	10.0097	9.33942	14.9746	20.934	16.6923	14.7343	18.7798	16.1984
									3 dpi Muller	10.459	11.3924	12.3234	10.0561	11.1579	10.0794	29.9492	29.5369	26.6201	28.9959	26.3752	23.552
glula	1.93667	-0.68	-1.68333	-1.79333	1.49667	0.413333			cxcl18b+ Muller	2.05623	1.65481	3.605	1.4811	1.66248	1.03049	9.9024	9.78866	7.23225	9.9024	10.5155	5.50641
glulb	4.58333	1.71667	0.253333	-0.286667	1.81	0.733333			PCNA+ Muller	1.31646	2.94173	3.78423	1.52626	2.54324	2.18354	1.74244	9.41163	17.0037	6.50303	9.69861	11.6139
										1.14605	2.91467	11.2615	10.4589	2.05623	1.31646	1.622	1.75051	14.9746	29.9492	9.9024	1.74244
										0.899171	2.51984	10.315	11.3924	1.65481	2.94173	1.66376	3.42106	20.934	29.5369	9.78866	9.41163
										0.799221	3.63008	10.3627	12.3234	3.605	3.78423	0.765484	3.79591	16.6923	26.6201	7.23225	17.0037
										0.993092		10.0098	11.1579	1.66248	2.54324	1.38938		18.7798	26.3752	10.5155	9.69861
										0.759611	4.65893	9.33942	10.0794	1.03049	2.18354	0.8054	5.87441	16.1984	23.552	5.50641	11.6139

## Sheet: E
20231019-1
Δct	other cell type	RPs	Uninjury Muller	3 dpi Muller	cxcl18b+ Muller	PCNA+ Muller		Δct	RPs	RPs	RPs	RPs	RPs	RPs	average
glula	1.34333	-0.00333333	-1.95333	-1.84667	0.5	1.14333		glula	-0.00333333	0.206667	-0.32	-2.29333	-2.30333	-0.68	-0.898889
glulb	3.57333	3.46333	0.366667	-0.633333	0.963333	3.47		glulb	3.46333	2.49667	2.34667	-0.34	-0.236667	1.71667	1.57444
20231019-2
Δct	other cell type	RPs	Uninjury Muller	3 dpi Muller	cxcl18b+ Muller	PCNA+ Muller		Δct	other cell type	other cell type	other cell type	other cell type	other cell type	other cell type		ΔΔct/other cell type								power
glula	1.69333	0.206667	-1.82667	-1.97	0.813333	-0.0166667		glula	1.34333	1.69333	1.86333	0.853333	1.55	1.93667		glula	2.24222	2.59222	2.76222	1.75222	2.44889	2.83556		glula	0.211361	0.16583	0.147397	0.296844	0.183152	0.140092
glulb	3.53667	2.49667	-0.116667	-0.613333	0.98	1.03667		glulb	3.57333	3.53667	4.65667	5.48	3.79667	4.58333		glulb	1.99889	1.96222	3.08222	3.90556	2.22222	3.00889		glulb	0.250193	0.256633	0.118075	0.0667284	0.214311	0.124232
20231019-3
Δct	other cell type	RPs	Uninjury Muller	3 dpi Muller	cxcl18b+ Muller	PCNA+ Muller		Δct	RPs	RPs	RPs	RPs	RPs	RPs		ΔΔct/other cell type
glula	1.86333	-0.32	-1.83333	-2.08333	-0.31	-0.38		glula	-0.00333333	0.206667	-0.32	-2.29333	-2.30333	-0.68		glula	0.895556	1.10556	0.578889	-1.39444	-1.40444	0.218889			0.53754	0.464723	0.669479	2.62887	2.64716	0.859227
glulb	4.65667	2.34667	0.21	-0.463333	1.41667	0.183333		glulb	3.46333	2.49667	2.34667	-0.34	-0.236667	1.71667		glulb	1.88889	0.922222	0.772222	-1.91444	-1.81111	0.142222			0.270015	0.527696	0.585515	3.76969	3.50912	0.906122
20231128-1
Δct	other cell type	RPs	Uninjury Muller	3 dpi Muller	cxcl18b+ Muller	PCNA+ Muller		Δct	Uninjury Muller	Uninjury Muller	Uninjury Muller	Uninjury Muller	Uninjury Muller	Uninjury Muller		ΔΔct/other cell type
glula	0.853333	-2.29333	-1.84	-1.79	0.973333	0.93		glula	-1.95333	-1.82667	-1.83333	-1.84	-1.78333	-1.68333		glula	-1.05444	-0.927778	-0.934444	-0.941111	-0.884444	-0.784444			2.07692	1.90234	1.91115	1.92001	1.84605	1.72243
glulb	5.48	-0.34	0.39	-0.586667	0.963333	1.57		glulb	0.366667	-0.116667	0.21	0.39	0.04	0.253333		glulb	-1.20778	-1.69111	-1.36444	-1.18444	-1.53444	-1.32111			2.30982	3.22905	2.57477	2.27276	2.89677	2.49858
20231128-2
Δct	other cell type	RPs	Uninjury Muller	3 dpi Muller	cxcl18b+ Muller	PCNA+ Muller		Δct	3 dpi Muller	3 dpi Muller	3 dpi Muller	3 dpi Muller	3 dpi Muller	3 dpi Muller		ΔΔct/other cell type
glula	1.55	-2.30333	-1.78333	-1.94	0.806667	0.193333		glula	-1.84667	-1.97	-2.08333	-1.79	-1.94	-1.79333		glula	-0.947778	-1.07111	-1.18444	-0.891111	-1.04111	-0.894444			1.9289	2.10105	2.27276	1.8546	2.05781	1.85889
glulb	3.79667	-0.236667	0.04	-0.45	0.876667	0.993333		glulb	-0.633333	-0.613333	-0.463333	-0.586667	-0.45	-0.286667		glulb	-2.20778	-2.18778	-2.03778	-2.16111	-2.02444	-1.86111			4.61963	4.55603	4.10613	4.47259	4.06835	3.63287
20231128-3
Δct	other cell type	RPs	Uninjury Muller	3 dpi Muller	cxcl18b+ Muller	PCNA+ Muller		Δct	cxcl18b+ Muller	cxcl18b+ Muller	cxcl18b+ Muller	cxcl18b+ Muller	cxcl18b+ Muller	cxcl18b+ Muller		ΔΔct/other cell type
glula	1.93667	-0.68	-1.68333	-1.79333	1.49667	0.413333		glula	0.5	0.813333	-0.31	0.973333	0.806667	1.49667		glula	1.39889	1.71222	0.588889	1.87222	1.70556	2.39556			0.379221	0.30519	0.664855	0.273152	0.306603	0.190049
glulb	4.58333	1.71667	0.253333	-0.286667	1.81	0.733333		glulb	0.963333	0.98	1.41667	0.963333	0.876667	1.81		glulb	-0.611111	-0.594444	-0.157778	-0.611111	-0.697778	0.235556			1.52744	1.50989	1.11557	1.52744	1.622	0.849358
								Δct	PCNA+ Muller	PCNA+ Muller	PCNA+ Muller	PCNA+ Muller	PCNA+ Muller	PCNA+ Muller		ΔΔct/other cell type
								glula	1.14333	-0.0166667	-0.38	0.93	0.193333	0.413333		glula	2.04222	0.882222	0.518889	1.82889	1.09222	1.31222			0.242789	0.542531	0.697909	0.281481	0.469038	0.4027
								glulb	3.47	1.03667	0.183333	1.57	0.993333	0.733333		glulb	1.89556	-0.537778	-1.39111	-0.00444444	-0.581111	-0.841111			0.26877	1.45173	2.62281	1.00309	1.496	1.79143
Data analysis
0.211361	0.16583	0.147397	0.296844	0.183152	0.140092	0.250193	0.256633	0.118075	0.0667284	0.214311	0.124232		other cell type
0.53754	0.464723	0.669479	2.62887	2.64716	0.859227	0.270015	0.527696	0.585515	3.76969	3.50912	0.906122		RPs
2.07692	1.90234	1.91115	1.92001	1.84605	1.72243	2.30982	3.22905	2.57477	2.27276	2.89677	2.49858		Uninjury Muller
1.9289	2.10105	2.27276	1.8546	2.05781	1.85889	4.61963	4.55603	4.10613	4.47259	4.06835	3.63287		3 dpi Muller
0.379221	0.30519	0.664855	0.273152	0.306603	0.190049	1.52744	1.50989	1.11557	1.52744	1.622	0.849358		cxcl18b+ Muller
0.242789	0.542531	0.697909	0.281481	0.469038	0.4027	0.26877	1.45173	2.62281	1.00309	1.496	1.79143		PCNA+ Muller

## Sheet: F
					Δct	Uninjury Muller	Uninjury Muller	Uninjury Muller	Uninjury Muller	Uninjury Muller	Uninjury Muller	average
3 dpi Muller	cxcl18b+ Muller	PCNA+ Muller			cxcl18b	8.75	1.49333	4.29667	9.73667	9.03333	7.48333	6.79889
5.83333	5.14	2.38333			glula	-1.95333	-1.82667	-1.83333	-1.84	-1.78333	-1.68333	-1.82
-1.84667	0.5	1.14333			glulb	0.366667	-0.116667	0.21	0.39	0.04	0.253333	0.190556
-0.633333	0.963333	3.47			PCNA	5.71	4.05667	5.42667	6.14667	6.6	6.02333	5.66056
3.24333	3.16667	4.58667
					Δct	Uninjury Muller	Uninjury Muller	Uninjury Muller	Uninjury Muller	Uninjury Muller	Uninjury Muller		ΔΔct								2-ΔΔct
3 dpi Muller	cxcl18b+ Muller	PCNA+ Muller			cxcl18b	8.75	1.49333	4.29667	9.73667	9.03333	7.48333		cxcl18b	8.75	1.49333	4.29667	9.73667	9.03333	7.48333		cxcl18b	0.00232267	0.355191	0.0508832	0.00117212	0.00190852	0.00558846
2.44667	1.28	1.67			glula	-1.95333	-1.82667	-1.83333	-1.84	-1.78333	-1.68333		glula	-1.95333	-1.82667	-1.83333	-1.84	-1.78333	-1.68333		glula	3.87268	3.54717	3.56359	3.5801	3.44221	3.21169
-1.97	0.813333	-0.0166667			glulb	0.366667	-0.116667	0.21	0.39	0.04	0.253333		glulb	0.366667	-0.116667	0.21	0.39	0.04	0.253333		glulb	0.775572	1.08423	0.864537	0.76313	0.972655	0.838956
-0.613333	0.98	1.03667			PCNA	5.71	4.05667	5.42667	6.14667	6.6	6.02333		PCNA	5.71	4.05667	5.42667	6.14667	6.6	6.02333		PCNA	0.0191038	0.0600927	0.0232493	0.0141146	0.0103087	0.0153743
2.12	2.24	0.686667
					Δct	3 dpi Muller	3 dpi Muller	3 dpi Muller	3 dpi Muller	3 dpi Muller	3 dpi Muller		ΔΔct
3 dpi Muller	cxcl18b+ Muller	PCNA+ Muller			cxcl18b	5.83333	2.44667	4.68	5.79	7.90333	4.70333		cxcl18b	5.83333	2.44667	4.68	5.79	7.90333	4.70333			0.0175385	0.183434	0.0390103	0.0180733	0.00417695	0.0383845
4.68	2.35333	1.25667			glula	-1.84667	-1.97	-2.08333	-1.79	-1.94	-1.79333		glula	-1.84667	-1.97	-2.08333	-1.79	-1.94	-1.79333			3.59668	3.91768	4.23785	3.45815	3.83706	3.46615
-2.08333	-0.31	-0.38			glulb	-0.633333	-0.613333	-0.463333	-0.586667	-0.45	-0.286667		glulb	-0.633333	-0.613333	-0.463333	-0.586667	-0.45	-0.286667			1.55114	1.52979	1.37872	1.50177	1.36604	1.21982
-0.463333	1.41667	0.183333			PCNA	3.24333	2.12	3.23	3.62667	3.59	3.65333		PCNA	3.24333	2.12	3.23	3.62667	3.59	3.65333			0.105599	0.230047	0.106579	0.0809589	0.0830429	0.0794762
3.23	4.44667	0.92
					Δct	cxcl18b+ Muller	cxcl18b+ Muller	cxcl18b+ Muller	cxcl18b+ Muller	cxcl18b+ Muller	cxcl18b+ Muller		ΔΔct
3 dpi Muller	cxcl18b+ Muller	PCNA+ Muller			cxcl18b	5.14	1.28	2.35333	3.80667	3.65	4.37667		cxcl18b	5.14	1.28	2.35333	3.80667	3.65	4.37667			0.02836	0.411796	0.195693	0.0714627	0.07966	0.0481384
5.79	3.80667	3.14667			glula	0.5	0.813333	-0.31	0.973333	0.806667	1.49667		glula	0.5	0.813333	-0.31	0.973333	0.806667	1.49667			0.707107	0.569066	1.23971	0.509328	0.571701	0.354371
-1.79	0.973333	0.93			glulb	0.963333	0.98	1.41667	0.963333	0.876667	1.81		glulb	0.963333	0.98	1.41667	0.963333	0.876667	1.81			0.512871	0.50698	0.374577	0.512871	0.544624	0.285191
-0.586667	0.963333	1.57			PCNA	3.16667	2.24	4.44667	1.47333	2.28667	2.79667		PCNA	3.16667	2.24	4.44667	1.47333	2.28667	2.79667			0.111362	0.211686	0.0458585	0.360149	0.204948	0.143919
3.62667	1.47333	3.57667
					Δct	PCNA+ Muller	PCNA+ Muller	PCNA+ Muller	PCNA+ Muller	PCNA+ Muller	PCNA+ Muller		ΔΔct
3 dpi Muller	cxcl18b+ Muller	PCNA+ Muller			cxcl18b	2.38333	1.67	1.25667	3.14667	0.666667	2.52333		cxcl18b	2.38333	1.67	1.25667	3.14667	0.666667	2.52333			0.191666	0.314253	0.41851	0.112917	0.629961	0.173941
7.90333	3.65	0.666667			glula	1.14333	-0.0166667	-0.38	0.93	0.193333	0.413333		glula	1.14333	-0.0166667	-0.38	0.93	0.193333	0.413333			0.452712	1.01162	1.30134	0.524858	0.874583	0.750886
-1.94	0.806667	0.193333			glulb	3.47	1.03667	0.183333	1.57	0.993333	0.733333		glulb	3.47	1.03667	0.183333	1.57	0.993333	0.733333			0.0902456	0.487452	0.880666	0.336808	0.502316	0.601513
-0.45	0.876667	0.993333			PCNA	4.58667	0.686667	0.92	3.57667	0.873333	1.53333		PCNA	4.58667	0.686667	0.92	3.57667	0.873333	1.53333			0.0416175	0.621288	0.528509	0.0838139	0.545884	0.345478
3.59	2.28667	0.873333
					total 6 row data
					0.258617	39.5486	5.66557	0.130509	0.212503	0.622245	1.09682	1.00463	1.00928	1.01396	0.974905	0.909618	0.885086	1.23732	0.986613	0.870886	1.11	0.957419	0.966308	3.03962	1.176	0.713947	0.521434	0.777666
3 dpi Muller	cxcl18b+ Muller	PCNA+ Muller			1.95282	20.4244	4.34359	2.01236	0.465082	4.27391	1.01866	1.10957	1.20025	0.97942	1.08673	0.981686	1.77017	1.7458	1.5734	1.71383	1.55893	1.39206	5.34142	11.6363	5.39101	4.09507	4.20048	4.02007
4.70333	4.37667	2.52333			3.15773	45.8512	21.7894	7.95699	8.86972	5.35996	0.200267	0.161171	0.351111	0.144252	0.161918	0.100365	0.585289	0.578567	0.427468	0.585289	0.621527	0.325461	5.63294	10.7075	2.31962	18.2171	10.3667	7.27975
-1.79333	1.49667	0.413333			21.341	34.9904	46.5988	12.5727	70.1428	19.3674	0.128218	0.286512	0.368567	0.148651	0.2477	0.212667	0.102989	0.556282	1.00502	0.384367	0.573244	0.686448	2.1051	31.426	26.7331	4.23948	27.612	17.475
-0.286667	1.81	0.733333
3.65333	2.79667	1.53333
					Data analysis
					0.258617	5.66557	0.130509	0.212503	0.622245	1.09682	1.00928	1.01396	0.974905	0.909618	0.885086	0.986613	0.870886	1.11	0.957419	0.966308	1.176	0.713947	0.521434	0.777666
					1.95281	4.34359	2.01236	0.465082	4.27391	1.01866	1.20025	0.97942	1.08674	0.981686	1.77017	1.5734	1.71383	1.55893	1.39206	5.34142	5.39101	4.09507	4.20048	4.02007
					3.15773	21.7894	7.95699	8.86972	5.35996	0.200267	0.351111	0.144252	0.161918	0.100365	0.585289	0.427468	0.585289	0.621527	0.325461	5.63294	2.31962	18.2171	10.3667	7.27975
					21.341	46.5988	12.5727	34.9904	19.3674	0.128218	0.368567	0.148651	0.286512	0.212667	0.102989	1.00502	0.384367	0.556282	0.686448	2.1051	26.7331	4.23949	31.4261	17.475
