# Supplementary material for: cxcl18b-defined transitional state-specific nitric oxide drives injury-induced Müller glia cell-cycle re-entry in the zebrafish retina
Source: eLife. 2026 Jan 21;14:RP106274. doi: 10.7554/eLife.106274 (PMC12823065; doi:10.7554/eLife.106274)
Supplement: Figure 5—source data 1. [file elife-106274-fig5-data1.xlsx]

## Sheet: total 6 data
20231019-1
Δct	other cell type	RPs	Uninjury Muller	3 dpi Muller	cxcl18b+ Muller	PCNA+ Muller
cxcl18b	8.96	3.08667	8.75	5.83333	5.14	2.38333
glula	1.34333	-0.00333333	-1.95333	-1.84667	0.5	1.14333
glulb	3.57333	3.46333	0.366667	-0.633333	0.963333	3.47
PCNA	5.23333	4.37333	5.71	3.24333	3.16667	4.58667
20231019-2
Δct	other cell type	RPs	Uninjury Muller	3 dpi Muller	cxcl18b+ Muller	PCNA+ Muller
cxcl18b	0.95	-0.656667	1.49333	2.44667	1.28	1.67
glula	1.69333	0.206667	-1.82667	-1.97	0.813333	-0.0166667
glulb	3.53667	2.49667	-0.116667	-0.613333	0.98	1.03667
PCNA	2.82	1.94	4.05667	2.12	2.24	0.686667
20231022-1
Δct	other cell type	RPs	Uninjury Muller	3 dpi Muller	cxcl18b+ Muller	PCNA+ Muller
cxcl18b	3.48	2.02	4.29667	4.68	2.35333	1.25667
glula	1.86333	-0.32	-1.83333	-2.08333	-0.31	-0.38
glulb	4.65667	2.34667	0.21	-0.463333	1.41667	0.183333
PCNA	4.34	5.43667	5.42667	3.23	4.44667	0.92
20231122-2
Δct	other cell type	RPs	Uninjury Muller	3 dpi Muller	cxcl18b+ Muller	PCNA+ Muller
cxcl18b	8.09667	4.07	9.73667	5.79	3.80667	3.14667
glula	0.853333	-2.29333	-1.84	-1.79	0.973333	0.93
glulb	5.48	-0.34	0.39	-0.586667	0.963333	1.57
PCNA	4.68	4.01	6.14667	3.62667	1.47333	3.57667
20231128-1
Δct	other cell type	RPs	Uninjury Muller	3 dpi Muller	cxcl18b+ Muller	PCNA+ Muller
cxcl18b	8.11667	3.97667	9.03333	7.90333	3.65	0.666667
glula	1.55	-2.30333	-1.78333	-1.94	0.806667	0.193333
glulb	3.79667	-0.236667	0.04	-0.45	0.876667	0.993333
PCNA	5.42333	4.00333	6.6	3.59	2.28667	0.873333
20231128-2
Δct	other cell type	RPs	Uninjury Muller	3 dpi Muller	cxcl18b+ Muller	PCNA+ Muller
cxcl18b	8.21667	4.6	7.48333	4.70333	4.37667	2.52333
glula	1.93667	-0.68	-1.68333	-1.79333	1.49667	0.413333
glulb	4.58333	1.71667	0.253333	-0.286667	1.81	0.733333
PCNA	4.80667	5.77333	6.02333	3.65333	2.79667	1.53333
