# Supplementary material for: cxcl18b-defined transitional state-specific nitric oxide drives injury-induced Müller glia cell-cycle re-entry in the zebrafish retina
Source: eLife. 2026 Jan 21;14:RP106274. doi: 10.7554/eLife.106274 (PMC12823065; doi:10.7554/eLife.106274)
Supplement: Figure 6—source data 1. [file elife-106274-fig6-data1.xlsx]

## Sheet: Virus-Cre+cxcl18b-gal4
UAS:Cas9-2a-Cre+cxcl18b-gal4	PCNA+ muller			Virus labled muller		18+/PCNA+ muller		18+/PCNA- muller
Right eyes injection	Left eyes	Right eyes
Left eyes as ctrl	12	5		1		1		0		17	13	4		0.764706	0.235294		0.764706	0.235294
		8		3		2		1									0.870968	0.129032
				2		2		0									0.555556	0.444444
	10	4		2		2		0									0.625	0.375
	11	6		1		1		0									1	0
		9		1		1		0									0.75	0.25
	11	6		3		2		1									0.75	0.25
		9		4		2		2									0.708333	0.291667
	6	10		3		3		0		31	27	4		0.870968	0.129032
		8		3		1		2
		8		4		4		0
		7		4		3		1
		11		6		6		0
		7		2		2		0
	8	9		2		2		0
		10		4		3		1
		10		3		3		0
		12								18	10	8		0.555556	0.444444
		15		3		2		1
		10		3		1		2
	9	8		2		2		0
		7		3		1		2
		9		7		4		3
	9	9		1		0		1		8	5	3		0.625	0.375
	9	9		2		1		1
	13	10		2		1		1
	12	7		2		2		0
		10		1		1		0
	9	9		1		1		0		6	6	0		1	0
	8	8		1		1		0
		5		1		1		0
		9		2		2		0
		10		1		1		0
	12	11		1		1		0		4	3	1		0.75	0.25
		7		1		0		1
		6		2		2		0
	19	12		2		2		0		12	9	3		0.75	0.25
	18	13		5		3		2
		10		3		2		1
	13	8		1		1		0
	17	8		1		1		0
	12	12		1		0		1		24	17	7		0.708333	0.291667
	10	8		8		6		2
	9	6		4		3		1
	11	10		5		4		1
		9		2		2		0
		10		4		2		2
										120	90

## Sheet: Virus-sgnos2b+cxcl18b-gal4
UAS:Cas9-2a-Cre-sgnos2b+cxcl18b-gal4	PCNA+ muller			Virus labled muller		18+/PCNA+ muller		18+/PCNA- muller
Right eyes injection	Left eyes	Right eyes
Left eyes as ctrl	8	2		1		0		1		8	2	6		0.25	0.75
	12	6		1		0		1
	10	5		3		1		2
		2		1		0		1
	11	4		2		1		1
	7	6		3		1		2		14	5	9		0.357143	0.642857
		6		1		0		1
	11	9		2		1		1
		10		2		1		1
	8	8		4		1		3
	9	7		2		1		1
	16	6		1		0		1		25	5	20		0.2	0.8
	18	7		4		0		4
		8		5		0		5
		8		4		1		3
		9		3		2		1
	22	10		3		0		3
	23	9		5		2		3
	11	6		5		2		3		17	5	12		0.294118	0.705882
	12	13		2		2		0
		8		2		0		2
		10		2		0		2
	15	13		1		0		1
		11		2		0		2
		9		3		1		2
	17	6		3		0		3		21	3	18		0.142857	0.857143
	14	5		3		1		2
	13	3		1		0		1
	14	6		5		0		5
		6		3		2		1
		7		3		0		3
		3		3		0		3
	14	7		1		0		1		18	2	16		0.111111	0.888889
	15	6		1		0		1
	12	5		2		0		2
	11	6		3		1		2
		5		2		0		2
		5		3		0		3
		4		4		0		4
				2		1		1
										103	22
