# Supplementary material for: cxcl18b-defined transitional state-specific nitric oxide drives injury-induced Müller glia cell-cycle re-entry in the zebrafish retina
Source: eLife. 2026 Jan 21;14:RP106274. doi: 10.7554/eLife.106274 (PMC12823065; doi:10.7554/eLife.106274)
Supplement: Figure 7—source data 1. [file elife-106274-fig7-data1.xlsx]

## Sheet: Sheet1
Tg(tp1: GFP) x Tg(lws2: nfsb-mcherry) 20241202
1 dpi							2 dpi
PCNA			tp1: GFP				PCNA			tp1: GFP
Uninjury	1 dpi	C-PTIO	Uninjury	1 dpi	C-PTIO		Uninjury	2 dpi	C-PTIO	Uninjury	2 dpi	C-PTIO
0	0	0	52	39	44		0	12	4	52	42	31
0	0	0	48	41	46		0	6	2	55	36	46
0	0	1	48	34	49		0	9	4	48	42	47
0	1	0	50	36	53		0	11	2	53	41	48
0	1	0	53	36	50		0	7	1	55	40	50
0	3	0	48	31	54		0	10	2	55	41	50
0	0	0	49	34	55			6	7		39	54
0		2	50		48			5	4		37	53
0		0	56		46				3			53
Tg(tp1: GFP) x Tg(lws2: nfsb-mcherry) 20241114
1 dpi							2 dpi							3 dpi
PCNA			tp1: GFP				PCNA			tp1: GFP				PCNA			tp1: GFP
Uninjury	1 dpi	C-PTIO	Uninjury	1 dpi	C-PTIO		Uninjury	2 dpi	C-PTIO	Uninjury	2 dpi	C-PTIO		Uninjury	3 dpi	C-PTIO	Uninjury	3 dpi	C-PTIO
0	0	0	43	32	44		0	13	4	43	26	42		0	8	4	40	33	47
1	0	0	40	32	43		1	13	0	40	33	40		0	7	7	40	27	45
0	0	0	43	35	42		0	11	0	43	30	40		0	16	7	43	33	44
0	0	0	42	35	41		0	6	0	42	28	43			9	1		30	44
	0	0		35	42				4			43			12	2		36	42
	1	0		41	40										11	8		37	43
	0			31												15			45
	0			36
	0			31
